# Supplementary material for: Transcriptional Profile of Aedes aegypti Leucine-Rich Repeat Proteins in Response to Zika and Chikungunya Viruses
Source: MDPI journal article supplement (doi:10.3390/ijms20030615), 2019-01-31
Supplement: s1 [file s1]

**Supplementary Materials: Table S1:** Female *Aedes aegypti* transcriptomic RNA-seq data show Leucine-Rich Repeat Proteins 7-days post infection or post injection between Key west and Orlando strains.

**Table 1.** Female *Aedes aegypti* transcriptomic RNA-seq data show Leucine-Rich Repeat Proteins related genes expression in the Zika infection in Key West strain compared with Orlando strain *Aedes aegypti* 7-days post infection.

| Transcript ID              | Log2FC  | p-adj                 | Gene description                                  |
|----------------------------|---------|-----------------------|---------------------------------------------------|
| AAEL000108-RA              | 0.8163  | $8.6 \times 10^{-1}$  | leucine aminopeptidase                            |
| AAEL000243-RA              | -2.1351 | $1.3 \times 10^{-2}$  | leucine-rich transmembrane protein                |
| AAEL000424-RA              | -0.1229 | $1.0 \times 10^{-1}$  | leucine aminopeptidase                            |
| AAEL000925-RA              | -0.0806 | $5.5 \times 10^{-1}$  | leucine-zipper-like transcriptional regulator     |
| AAEL001401-RA              | 3.2722  | $2.3 \times 10^{-27}$ | leucine-rich immune protein (Short)               |
| AAEL001402-RA              | 3.2947  | $3.3 \times 10^{-33}$ | leucine-rich immune protein (Short)               |
| AAEL001414-RA              | 3.3722  | $2.1 \times 10^{-36}$ | leucine-rich immune protein (Short)               |
| AAEL001417-RA              | 3.9485  | $2.0 \times 10^{-5}$  | leucine-rich immune protein (Short)               |
| AAEL001420-RA              | 3.4335  | $1.6 \times 10^{-73}$ | leucine-rich immune protein (Short)               |
| AAEL001649-RA              | -0.2792 | $4.7 \times 10^{-3}$  | leucine aminopeptidase                            |
| AAEL001766-RA              | 1.7007  | $2.4 \times 10^{-2}$  | leucine-rich transmembrane protein                |
| AAEL002166-RA              | -0.0764 | $4.8 \times 10^{-1}$  | leucine rich repeat (in flii) interacting protein |
| AAEL002295-RA              | 2.4545  | $1.9 \times 10^{-44}$ | leucine-rich transmembrane protein                |
| AAEL002307-RA              | 1.0570  | $6.1 \times 10^{-2}$  | leucine-rich transmembrane protein                |
| AAEL002615-RA              | 2.2527  | $5.0 \times 10^{-12}$ | leucine-rich transmembrane protein                |
| AAEL003262-RA              | 1.8141  | $3.9 \times 10^{-5}$  | leucine-rich transmembrane protein                |
| AAEL003408-RA              | 1.3747  | $5.3 \times 10^{-6}$  | leucine-rich transmembrane protein                |
| AAEL003554-RA              | 0.0380  | $8.3 \times 10^{-1}$  | leucine rich repeat protein                       |
| AAEL003597-RA              | 1.8100  | $2.7 \times 10^{-1}$  | leucine-rich transmembrane protein                |
| AAEL003597-RB              | 1.4073  | $4.9 \times 10^{-1}$  | leucine-rich transmembrane protein                |
| AAEL003713-RA              | 1.3970  | $7.3 \times 10^{-4}$  | leucine-rich transmembrane protein                |
| AAEL003720-RA              | 1.1688  | $5.6 \times 10^{-5}$  | leucine-rich transmembrane protein                |
| AAEL003859-RA              | 0.2431  | $2.1 \times 10^{-1}$  | leucine-rich transmembrane protein                |
| AAEL004466-RA              | 2.5519  | $4.4 \times 10^{-1}$  | leucine-rich immune protein (Coil-less)           |
| AAEL004773-RA              | -0.0661 | $6.3 \times 10^{-1}$  | leucine carboxyl methyltransferase                |
| AAEL005351-RA              | -0.0974 | $2.1 \times 10^{-1}$  | leucine-rich transmembrane protein                |
| AAEL005734-RA              | 0.0613  | $6.7 \times 10^{-1}$  | leucine-rich transmembrane protein                |
| AAEL005762-RA              | 2.2277  | $2.7 \times 10^{-5}$  | leucine-rich transmembrane protein                |
| AAEL006026-RA              | -0.0266 | $9.2 \times 10^{-1}$  | leucine rich protein, putative                    |
| AAEL006377-RA              | 1.5263  | $1.2 \times 10^{-1}$  | leucine-rich immune protein (Coil-less)           |
| AAEL006975-RA              | 1.7989  | $8.7 \times 10^{-5}$  | leucine aminopeptidase                            |
| AAEL007103-RA              | 3.2536  | $7.5 \times 10^{-11}$ | leucine-rich immune protein TM                    |
| AAEL007224-RA              | 1.1275  | $1.4 \times 10^{-1}$  | leucine-rich immune protein (Coil-less)           |
| AAEL007231-RA              | 0.1956  | $1.0 \times 10^{-0}$  | leucine-rich immune protein (Coil-less)           |
| AAEL007363-RA              | 0.8814  | $5.2 \times 10^{-6}$  | leucine-rich transmembrane protein                |
| AAEL007565-RA              | -0.0052 | $1.0 \times 10^{-0}$  | leucine rich protein, putative                    |
| AAEL007778-RA              | 1.5531  | $8.6 \times 10^{-15}$ | leucine-rich transmembrane protein                |
| AAEL007785-RA              | 1.0229  | $1.2 \times 10^{-1}$  | leucine-rich transmembrane protein                |
| AAEL008658-RA              | 2.4764  | $1.6 \times 10^{-11}$ | leucine-rich immune protein TM                    |
| AAEL009520-RA <sup>1</sup> | 3.0383  | $4.5 \times 10^{-25}$ | leucine-rich immune protein (Long)                |
| AAEL009792-RA              | 0.6257  | $8.4 \times 10^{-1}$  | leucine-rich immune protein (Coil-less)           |

| Transcript ID | Log2FC  | p-adj                 | Gene description                                  |
|---------------|---------|-----------------------|---------------------------------------------------|
| AAEL009894-RA | -0.1055 | $4.2 \times 10^{-1}$  | leucine-rich immune protein (Coil-less)           |
| AAEL010111-RA | 0.7172  | $2.1 \times 10^{-1}$  | leucine-rich transmembrane protein                |
| AAEL010125-RA | 3.2598  | $7.0 \times 10^{-8}$  | leucine-rich immune protein (Coil-less)           |
| AAEL010128-RA | 4.8149  | $2.4 \times 10^{-7}$  | leucine-rich immune protein (Long)                |
| AAEL010132-RA | 0.1733  | $1.0 \times 10^{-0}$  | leucine-rich immune protein (Long)                |
| AAEL010286-RA | 1.5368  | $1.1 \times 10^{-1}$  | leucine-rich transmembrane protein                |
| AAEL010656-RA | 2.7658  | $3.9 \times 10^{-7}$  | leucine-rich immune protein (Short)               |
| AAEL010772-RA | 0.3692  | $8.7 \times 10^{-1}$  | Leucine-rich repeat-containing protein 50 homolog |
| AAEL011387-RA | 0.2131  | $5.3 \times 10^{-1}$  | leucine-rich repeat protein                       |
| AAEL011760-RA | -0.2186 | $8.7 \times 10^{-1}$  | leucine-rich transmembrane protein                |
| AAEL012086-RA | 2.4679  | $1.7 \times 10^{-12}$ | leucine-rich immune protein (Long)                |
| AAEL012092-RA | 2.1252  | $2.6 \times 10^{-28}$ | leucine rich repeat protein                       |
| AAEL012093-RA | 2.2739  | $1.9 \times 10^{-10}$ | leucine-rich transmembrane protein                |
| AAEL012255-RA | 4.2146  | $2.0 \times 10^{-4}$  | leucine-rich immune protein (Short)               |
| AAEL012763-RA | 0.2781  | $7.3 \times 10^{-1}$  | leucine-rich immune protein (Coil-less)           |
| AAEL012767-RA | 0.2458  | $9.9 \times 10^{-1}$  | leucine-rich immune protein (Short)               |
| AAEL012771-RA | -2.1327 | $9.0 \times 10^{-2}$  | leucine-rich immune protein (Coil-less)           |
| AAEL012911-RA | 0.4919  | $1.8 \times 10^{-1}$  | leucine-rich immune protein (Coil-less)           |

<sup>1</sup> AAEL009520-RA is the same gene as AAEL024406.

**Table S1B.** Female *Aedes aegypti* transcriptomic RNA-seq data show Leucine-Rich Repeat Proteins related genes expression in Control (uninfected blood-feeding only) in the Key West strain compared with Orlando strain *Aedes aegypti* 7-days post injection.

| Transcript ID | Log2FC  | p-adj                 | Gene description                                  |
|---------------|---------|-----------------------|---------------------------------------------------|
| AAEL000108-RA | 0.2407  | $1.0 \times 10^{-0}$  | leucine aminopeptidase                            |
| AAEL000243-RA | 5.2443  | $1.8 \times 10^{-26}$ | leucine-rich transmembrane protein                |
| AAEL000424-RA | 0.2572  | $5.3 \times 10^{-1}$  | leucine aminopeptidase                            |
| AAEL000762-RA | 1.7648  | $4.0 \times 10^{-1}$  | leucine-rich immune protein (Coil-less)           |
| AAEL000925-RA | -0.0274 | $1.0 \times 10^{-0}$  | leucine-zipper-like transcriptional regulator     |
| AAEL001401-RA | 1.2776  | $7.7 \times 10^{-1}$  | leucine-rich immune protein (Short)               |
| AAEL001402-RA | 0.7638  | $8.5 \times 10^{-1}$  | leucine-rich immune protein (Short)               |
| AAEL001414-RA | 1.1630  | $7.5 \times 10^{-1}$  | leucine-rich immune protein (Short)               |
| AAEL001417-RA | 1.1400  | $5.8 \times 10^{-1}$  | leucine-rich immune protein (Short)               |
| AAEL001420-RA | 0.9209  | $8.7 \times 10^{-1}$  | leucine-rich immune protein (Short)               |
| AAEL001649-RA | 0.1852  | $7.8 \times 10^{-1}$  | leucine aminopeptidase                            |
| AAEL001766-RA | -0.2723 | $9.8 \times 10^{-1}$  | leucine-rich transmembrane protein                |
| AAEL002166-RA | 0.0549  | $9.8 \times 10^{-1}$  | leucine rich repeat (in flii) interacting protein |
| AAEL002295-RA | -0.0871 | $1.0 \times 10^{-0}$  | leucine-rich transmembrane protein                |
| AAEL002307-RA | -1.9783 | $5.3 \times 10^{-2}$  | leucine-rich transmembrane protein                |
| AAEL002615-RA | 0.1515  | $1.0 \times 10^{-0}$  | leucine-rich transmembrane protein                |
| AAEL003262-RA | 1.5448  | $1.4 \times 10^{-1}$  | leucine-rich transmembrane protein                |
| AAEL003408-RA | -1.3019 | $2.4 \times 10^{-1}$  | leucine-rich transmembrane protein                |
| AAEL003554-RA | -0.0706 | $9.7 \times 10^{-1}$  | leucine rich repeat protein                       |
| Transcript ID | Log2FC  | p-adj                 | Gene description                                  |

|                            |         |                      |                                                   |
|----------------------------|---------|----------------------|---------------------------------------------------|
| AAEL003597-RA              | 0.1151  | $1.0 \times 10^{-0}$ | leucine-rich transmembrane protein                |
| AAEL003713-RA              | 0.1831  | $1.0 \times 10^{-0}$ | leucine-rich transmembrane protein                |
| AAEL003720-RA              | -0.8548 | $5.4 \times 10^{-1}$ | leucine-rich transmembrane protein                |
| AAEL003859-RA              | 0.3130  | $7.8 \times 10^{-1}$ | leucine-rich transmembrane protein                |
| AAEL004466-RA              | 2.0123  | $8.8 \times 10^{-1}$ | leucine-rich immune protein (Coil-less)           |
| AAEL004773-RA              | 0.0049  | $1.0 \times 10^{-0}$ | leucine carboxyl methyltransferase                |
| AAEL005351-RA              | -0.1827 | $5.8 \times 10^{-1}$ | leucine-rich transmembrane protein                |
| AAEL005734-RA              | -0.2283 | $6.6 \times 10^{-1}$ | leucine-rich transmembrane protein                |
| AAEL005762-RA              | -0.4492 | $9.2 \times 10^{-1}$ | leucine-rich transmembrane protein                |
| AAEL006026-RA              | 0.0909  | $9.6 \times 10^{-1}$ | leucine rich protein, putative                    |
| AAEL006377-RA              | 0.2883  | $1.0 \times 10^{-0}$ | leucine-rich immune protein (Coil-less)           |
| AAEL006975-RA              | -1.4523 | $2.8 \times 10^{-1}$ | leucine aminopeptidase                            |
| AAEL007103-RA              | 1.5062  | $6.7 \times 10^{-1}$ | leucine-rich immune protein TM                    |
| AAEL007224-RA              | 1.6625  | $6.4 \times 10^{-1}$ | leucine-rich immune protein (Coil-less)           |
| AAEL007231-RA              | -0.2972 | $1.0 \times 10^{-0}$ | leucine-rich immune protein (Coil-less)           |
| AAEL007363-RA              | -0.3259 | $8.7 \times 10^{-1}$ | leucine-rich transmembrane protein                |
| AAEL007565-RA              | -0.0600 | $9.8 \times 10^{-1}$ | leucine rich protein, putative                    |
| AAEL007778-RA              | 1.1993  | $5.6 \times 10^{-1}$ | leucine-rich transmembrane protein                |
| AAEL007785-RA              | -0.4638 | $9.3 \times 10^{-1}$ | leucine-rich transmembrane protein                |
| AAEL008658-RA              | 0.3448  | $9.8 \times 10^{-1}$ | leucine-rich immune protein TM                    |
| AAEL009520-RA <sup>1</sup> | 1.7824  | $6.0 \times 10^{-1}$ | leucine-rich immune protein (Long)                |
| AAEL009792-RA              | -0.0468 | $1.0 \times 10^{-0}$ | leucine-rich immune protein (Coil-less)           |
| AAEL009894-RA              | -0.9167 | $2.9 \times 10^{-4}$ | leucine-rich immune protein (Coil-less)           |
| AAEL010111-RA              | 0.5586  | $8.8 \times 10^{-1}$ | leucine-rich transmembrane protein                |
| AAEL010125-RA              | 1.6477  | $5.3 \times 10^{-1}$ | leucine-rich immune protein (Coil-less)           |
| AAEL010128-RA              | -0.4969 | $9.1 \times 10^{-1}$ | leucine-rich immune protein (Long)                |
| AAEL010132-RA              | 1.1041  | $6.9 \times 10^{-1}$ | leucine-rich immune protein (Long)                |
| AAEL010286-RA              | 3.0287  | $1.5 \times 10^{-5}$ | leucine-rich transmembrane protein                |
| AAEL010656-RA              | -0.0488 | $1.0 \times 10^{-0}$ | leucine-rich immune protein (Short)               |
| AAEL010772-RA              | -0.0798 | $1.0 \times 10^{-0}$ | Leucine-rich repeat-containing protein 50 homolog |
| AAEL011387-RA              | 0.1003  | $1.0 \times 10^{-0}$ | leucine-rich repeat protein                       |
| AAEL011760-RA              | 2.0781  | $8.8 \times 10^{-2}$ | leucine-rich transmembrane protein                |
| AAEL012086-RA              | 2.1793  | $4.9 \times 10^{-1}$ | leucine-rich immune protein (Long)                |
| AAEL012092-RA              | -0.2727 | $9.7 \times 10^{-1}$ | leucine rich repeat protein                       |
| AAEL012093-RA              | -0.5269 | $7.5 \times 10^{-1}$ | leucine-rich transmembrane protein                |
| AAEL012255-RA              | 0.5067  | $9.4 \times 10^{-1}$ | leucine-rich immune protein (Short)               |
| AAEL012538-RA              | 1.3374  | $7.5 \times 10^{-1}$ | leucine-rich immune protein (Short)               |
| AAEL012763-RA              | 0.2824  | $9.6 \times 10^{-1}$ | leucine-rich immune protein (Coil-less)           |
| AAEL012767-RA              | 2.3014  | $1.8 \times 10^{-1}$ | leucine-rich immune protein (Short)               |
| AAEL012771-RA              | 2.5966  | $3.0 \times 10^{-1}$ | leucine-rich immune protein (Coil-less)           |
| AAEL012911-RA              | -0.6582 | $7.1 \times 10^{-1}$ | leucine-rich immune protein (Coil-less)           |
| AAEL015627-RA              | -0.1674 | $1.0 \times 10^{-1}$ | leucine-rich immune protein (Coil-less)           |

<sup>1</sup> AAEL009520-RA is the same gene as AAEL024406.

**Table S1C.** Female *Aedes aegypti* transcriptomic RNA-seq data show Leucine-Rich Repeat Proteins related genes dysregulated in the Key West strain *Aedes aegypti* 7-days post infection with ZIKV compared with Control (uninfected blood-feeding only) in Key West strain.

| Transcript ID              | Log2FC  | p-adj                   | Gene description                                  |
|----------------------------|---------|-------------------------|---------------------------------------------------|
| AAEL000108-RA              | -1.7731 | 4.8 x 10 <sup>-1</sup>  | leucine aminopeptidase                            |
| AAEL000243-RA              | -6.6469 | 7.6 x 10 <sup>-44</sup> | leucine-rich transmembrane protein                |
| AAEL000424-RA              | -0.3141 | 3.1 x 10 <sup>-1</sup>  | leucine aminopeptidase                            |
| AAEL000762-RA              | -1.1738 | 5.4 x 10 <sup>-1</sup>  | leucine-rich immune protein (Coil-less)           |
| AAEL000925-RA              | -0.0007 | 1.0 x 10 <sup>-0</sup>  | leucine-zipper-like transcriptional regulator     |
| AAEL001401-RA              | -1.3103 | 6.4 x 10 <sup>-1</sup>  | leucine-rich immune protein (Short)               |
| AAEL001402-RA              | -0.8166 | 7.5 x 10 <sup>-1</sup>  | leucine-rich immune protein (Short)               |
| AAEL001414-RA              | -1.4239 | 5.2 x 10 <sup>-1</sup>  | leucine-rich immune protein (Short)               |
| AAEL001417-RA              | -1.5243 | 1.7 x 10 <sup>-1</sup>  | leucine-rich immune protein (Short)               |
| AAEL001420-RA              | -1.3793 | 5.7 x 10 <sup>-1</sup>  | leucine-rich immune protein (Short)               |
| AAEL001649-RA              | -0.2873 | 4.6 x 10 <sup>-1</sup>  | leucine aminopeptidase                            |
| AAEL001766-RA              | 0.1960  | 9.8 x 10 <sup>-1</sup>  | leucine-rich transmembrane protein                |
| AAEL002166-RA              | -0.0592 | 9.5 x 10 <sup>-1</sup>  | leucine rich repeat (in flii) interacting protein |
| AAEL002295-RA              | 0.3188  | 7.8 x 10 <sup>-1</sup>  | leucine-rich transmembrane protein                |
| AAEL002307-RA              | 1.3559  | 2.1 x 10 <sup>-1</sup>  | leucine-rich transmembrane protein                |
| AAEL002615-RA              | 0.1694  | 9.9 x 10 <sup>-1</sup>  | leucine-rich transmembrane protein                |
| AAEL003262-RA              | -0.1092 | 1.0 x 10 <sup>-0</sup>  | leucine-rich transmembrane protein                |
| AAEL003408-RA              | 2.1477  | 1.8 x 10 <sup>-4</sup>  | leucine-rich transmembrane protein                |
| AAEL003554-RA              | 0.1223  | 7.6 x 10 <sup>-1</sup>  | leucine rich repeat protein                       |
| AAEL003597-RB              | -0.1468 | 1.0 x 10 <sup>-0</sup>  | leucine-rich transmembrane protein                |
| AAEL003713-RA              | -0.0746 | 1.0 x 10 <sup>-0</sup>  | leucine-rich transmembrane protein                |
| AAEL003720-RA              | 0.8861  | 9.8 x 10 <sup>-2</sup>  | leucine-rich transmembrane protein                |
| AAEL003859-RA              | -0.0278 | 1.0 x 10 <sup>-0</sup>  | leucine-rich transmembrane protein                |
| AAEL004466-RA              | 0.4468  | 1.0 x 10 <sup>-0</sup>  | leucine-rich immune protein (Coil-less)           |
| AAEL004773-RA              | -0.0228 | 1.0 x 10 <sup>-0</sup>  | leucine carboxyl methyltransferase                |
| AAEL005351-RA              | 0.1178  | 6.8 x 10 <sup>-1</sup>  | leucine-rich transmembrane protein                |
| AAEL005734-RA              | 0.2204  | 5.8 x 10 <sup>-1</sup>  | leucine-rich transmembrane protein                |
| AAEL005762-RA              | 0.5146  | 7.0 x 10 <sup>-1</sup>  | leucine-rich transmembrane protein                |
| AAEL006026-RA              | -0.0849 | 9.3 x 10 <sup>-1</sup>  | leucine rich protein, putative                    |
| AAEL006377-RA              | -0.8786 | 8.4 x 10 <sup>-1</sup>  | leucine-rich immune protein (Coil-less)           |
| AAEL006975-RA              | 2.0656  | 1.0 x 10 <sup>-2</sup>  | leucine aminopeptidase                            |
| AAEL007103-RA              | -0.5660 | 9.0 x 10 <sup>-1</sup>  | leucine-rich immune protein TM                    |
| AAEL007224-RA              | 0.0491  | 1.0 x 10 <sup>-0</sup>  | leucine-rich immune protein (Coil-less)           |
| AAEL007231-RA              | -2.5365 | 4.8 x 10 <sup>-1</sup>  | leucine-rich immune protein (Coil-less)           |
| AAEL007363-RA              | 0.3441  | 6.6 x 10 <sup>-1</sup>  | leucine-rich transmembrane protein                |
| AAEL007565-RA              | 0.0044  | 1.0 x 10 <sup>-0</sup>  | leucine rich protein, putative                    |
| AAEL007778-RA              | -1.4858 | 3.1 x 10 <sup>-1</sup>  | leucine-rich transmembrane protein                |
| AAEL007785-RA              | 0.5315  | 8.3 x 10 <sup>-1</sup>  | leucine-rich transmembrane protein                |
| AAEL008658-RA              | 0.3609  | 8.9 x 10 <sup>-1</sup>  | leucine-rich immune protein TM                    |
| AAEL009520-RA <sup>1</sup> | -0.9495 | 7.8 x 10 <sup>-1</sup>  | leucine-rich immune protein (Long)                |
| AAEL009792-RA              | -1.2373 | 6.2 x 10 <sup>-1</sup>  | leucine-rich immune protein (Coil-less)           |

| Transcript ID | Log2FC  | p-adj                | Gene description                                  |
|---------------|---------|----------------------|---------------------------------------------------|
| AAEL009894-RA | 0.8665  | $9.7 \times 10^{-5}$ | leucine-rich immune protein (Coil-less)           |
| AAEL010111-RA | -0.2184 | $9.6 \times 10^{-1}$ | leucine-rich transmembrane protein                |
| AAEL010125-RA | -1.5972 | $4.5 \times 10^{-1}$ | leucine-rich immune protein (Coil-less)           |
| AAEL010128-RA | -0.0478 | $1.0 \times 10^{-0}$ | leucine-rich immune protein (Long)                |
| AAEL010132-RA | -1.7077 | $3.7 \times 10^{-1}$ | leucine-rich immune protein (Long)                |
| AAEL010286-RA | -3.3918 | $5.0 \times 10^{-9}$ | leucine-rich transmembrane protein                |
| AAEL010656-RA | 0.2515  | $9.6 \times 10^{-1}$ | leucine-rich immune protein (Short)               |
| AAEL010772-RA | -0.3624 | $9.7 \times 10^{-1}$ | Leucine-rich repeat-containing protein 50 homolog |
| AAEL011387-RA | -0.1587 | $9.4 \times 10^{-1}$ | leucine-rich repeat protein                       |
| AAEL011760-RA | -0.9940 | $4.4 \times 10^{-1}$ | leucine-rich transmembrane protein                |
| AAEL012086-RA | -1.4555 | $6.0 \times 10^{-1}$ | leucine-rich immune protein (Long)                |
| AAEL012092-RA | 0.5027  | $4.8 \times 10^{-1}$ | leucine rich repeat protein                       |
| AAEL012093-RA | 0.9895  | $7.1 \times 10^{-2}$ | leucine-rich transmembrane protein                |
| AAEL012255-RA | -0.4482 | $9.4 \times 10^{-1}$ | leucine-rich immune protein (Short)               |
| AAEL012538-RA | -0.1787 | $1.0 \times 10^{-1}$ | leucine-rich immune protein (Short)               |
| AAEL012763-RA | -1.1587 | $1.5 \times 10^{-1}$ | leucine-rich immune protein (Coil-less)           |
| AAEL012767-RA | -2.6500 | $8.8 \times 10^{-2}$ | leucine-rich immune protein (Short)               |
| AAEL012771-RA | -1.2948 | $6.3 \times 10^{-1}$ | leucine-rich immune protein (Coil-less)           |
| AAEL012911-RA | 0.8990  | $2.6 \times 10^{-1}$ | leucine-rich immune protein (Coil-less)           |
| AAEL015627-RA | -0.1380 | $1.0 \times 10^{-0}$ | leucine-rich immune protein (Coil-less)           |

<sup>1</sup> AAEL009520-RA is the same gene as AAEL024406.

**Table S1D.** Female *Aedes aegypti* transcriptomic RNA-seq data show Leucine-Rich Repeat Proteins related genes dysregulated in the Orlando strain *Aedes aegypti* 7-days post infection with ZIKV compared with Control (uninfected blood-feeding only) in Orlando strain.

| Transcript ID | Log2FC  | p-adj                | Gene description                                  |
|---------------|---------|----------------------|---------------------------------------------------|
| AAEL000108-RA | -2.3592 | $3.5 \times 10^{-1}$ | leucine aminopeptidase                            |
| AAEL000243-RA | 0.7358  | $7.8 \times 10^{-1}$ | leucine-rich transmembrane protein                |
| AAEL000424-RA | 0.0654  | $8.7 \times 10^{-1}$ | leucine aminopeptidase                            |
| AAEL000925-RA | 0.0531  | $9.7 \times 10^{-1}$ | leucine-zipper-like transcriptional regulator     |
| AAEL001401-RA | -3.3173 | $6.3 \times 10^{-2}$ | leucine-rich immune protein (Short)               |
| AAEL001402-RA | -3.3550 | $6.1 \times 10^{-5}$ | leucine-rich immune protein (Short)               |
| AAEL001414-RA | -3.6456 | $5.0 \times 10^{-2}$ | leucine-rich immune protein (Short)               |
| AAEL001417-RA | -4.3471 | $7.7 \times 10^{-2}$ | leucine-rich immune protein (Short)               |
| AAEL001420-RA | -3.9058 | $4.5 \times 10^{-2}$ | leucine-rich immune protein (Short)               |
| AAEL001649-RA | 0.1785  | $5.5 \times 10^{-1}$ | leucine aminopeptidase                            |
| AAEL001766-RA | -1.7846 | $1.9 \times 10^{-1}$ | leucine-rich transmembrane protein                |
| AAEL002166-RA | 0.0738  | $9.0 \times 10^{-1}$ | leucine rich repeat (in flii) interacting protein |
| AAEL002295-RA | -2.2315 | $3.4 \times 10^{-2}$ | leucine-rich transmembrane protein                |
| AAEL002307-RA | -1.6840 | $4.1 \times 10^{-2}$ | leucine-rich transmembrane protein                |
| AAEL002615-RA | -1.9453 | $3.0 \times 10^{-1}$ | leucine-rich transmembrane protein                |
| AAEL003262-RA | -0.3746 | $9.6 \times 10^{-1}$ | leucine-rich transmembrane protein                |
| AAEL003408-RA | -0.5226 | $7.4 \times 10^{-1}$ | leucine-rich transmembrane protein                |
| AAEL003554-RA | 0.0152  | $1.0 \times 10^{-0}$ | leucine rich repeat protein                       |

| <b>Transcript ID</b>       | <b>Log2FC</b> | <b>p-adj</b>         | <b>Gene description</b>                           |
|----------------------------|---------------|----------------------|---------------------------------------------------|
| AAEL003597-RA              | -1.1217       | $9.3 \times 10^{-1}$ | leucine-rich transmembrane protein                |
| AAEL003597-RB              | -1.4416       | $6.3 \times 10^{-1}$ | leucine-rich transmembrane protein                |
| AAEL003713-RA              | -1.4416       | $6.3 \times 10^{-1}$ | leucine-rich transmembrane protein                |
| AAEL003720-RA              | -1.2985       | $4.1 \times 10^{-1}$ | leucine-rich transmembrane protein                |
| AAEL003859-RA              | -1.1459       | $2.6 \times 10^{-1}$ | leucine-rich transmembrane protein                |
| AAEL004466-RA              | 0.0440        | $1.0 \times 10^{-0}$ | leucine-rich immune protein (Coil-less)           |
| AAEL004773-RA              | -0.1240       | $1.0 \times 10^{-0}$ | leucine carboxyl methyltransferase                |
| AAEL005351-RA              | 0.0501        | $9.8 \times 10^{-1}$ | leucine-rich transmembrane protein                |
| AAEL005734-RA              | 0.0344        | $9.8 \times 10^{-1}$ | leucine-rich transmembrane protein                |
| AAEL005762-RA              | -0.0691       | $9.5 \times 10^{-1}$ | leucine-rich transmembrane protein                |
| AAEL006026-RA              | -2.1727       | $1.2 \times 10^{-1}$ | leucine rich protein, putative                    |
| AAEL006377-RA              | 0.0329        | $1.0 \times 10^{-0}$ | leucine-rich immune protein (Coil-less)           |
| AAEL006975-RA              | -2.1250       | $1.9 \times 10^{-2}$ | leucine aminopeptidase                            |
| AAEL007103-RA              | -1.1907       | $2.6 \times 10^{-1}$ | leucine-rich immune protein TM                    |
| AAEL007224-RA              | -2.3203       | $1.9 \times 10^{-2}$ | leucine-rich immune protein (Coil-less)           |
| AAEL007231-RA              | 0.5661        | $9.6 \times 10^{-1}$ | leucine-rich immune protein (Coil-less)           |
| AAEL007363-RA              | -3.0437       | $1.6 \times 10^{-1}$ | leucine-rich transmembrane protein                |
| AAEL007565-RA              | -0.8595       | $3.8 \times 10^{-2}$ | leucine rich protein, putative                    |
| AAEL007778-RA              | -0.0497       | $9.6 \times 10^{-1}$ | leucine-rich transmembrane protein                |
| AAEL007785-RA              | -1.8464       | $1.3 \times 10^{-2}$ | leucine-rich transmembrane protein                |
| AAEL008658-RA              | -0.9593       | $5.4 \times 10^{-1}$ | leucine-rich immune protein TM                    |
| AAEL009520-RA <sup>1</sup> | -1.7802       | $8.1 \times 10^{-2}$ | leucine-rich immune protein (Long)                |
| AAEL009792-RA              | -2.2074       | $2.8 \times 10^{-4}$ | leucine-rich immune protein (Coil-less)           |
| AAEL009894-RA              | 0.0551        | $9.9 \times 10^{-1}$ | leucine-rich immune protein (Coil-less)           |
| AAEL010111-RA              | -0.3721       | $9.2 \times 10^{-1}$ | leucine-rich transmembrane protein                |
| AAEL010125-RA              | -3.2166       | $2.2 \times 10^{-2}$ | leucine-rich immune protein (Coil-less)           |
| AAEL010128-RA              | -5.3692       | $2.8 \times 10^{-6}$ | leucine-rich immune protein (Long)                |
| AAEL010132-RA              | -0.7796       | $8.7 \times 10^{-1}$ | leucine-rich immune protein (Long)                |
| AAEL010286-RA              | -1.9108       | $5.4 \times 10^{-1}$ | leucine-rich transmembrane protein                |
| AAEL010656-RA              | -2.5623       | $4.4 \times 10^{-3}$ | leucine-rich immune protein (Short)               |
| AAEL010772-RA              | -0.8164       | $9.2 \times 10^{-1}$ | Leucine-rich repeat-containing protein 50 homolog |
| AAEL011387-RA              | -0.2728       | $8.2 \times 10^{-1}$ | leucine-rich repeat protein                       |
| AAEL011760-RA              | 1.2954        | $3.9 \times 10^{-1}$ | leucine-rich transmembrane protein                |
| AAEL012086-RA              | -1.7527       | $2.6 \times 10^{-2}$ | leucine-rich immune protein (Long)                |
| AAEL012092-RA              | -1.9051       | $1.2 \times 10^{-1}$ | leucine rich repeat protein                       |
| AAEL012093-RA              | -1.8185       | $2.4 \times 10^{-2}$ | leucine-rich transmembrane protein                |
| AAEL012255-RA              | -4.1624       | $3.1 \times 10^{-5}$ | leucine-rich immune protein (Short)               |
| AAEL012763-RA              | -1.1534       | $1.8 \times 10^{-1}$ | leucine-rich immune protein (Coil-less)           |
| AAEL012767-RA              | -0.6035       | $9.8 \times 10^{-1}$ | leucine-rich immune protein (Short)               |
| AAEL012771-RA              | 3.4269        | $5.6 \times 10^{-2}$ | leucine-rich immune protein (Coil-less)           |
| AAEL012911-RA              | -0.2531       | $9.4 \times 10^{-1}$ | leucine-rich immune protein (Coil-less)           |

<sup>1</sup> AAEL009520-RA is the same gene as AAEL024406.

**Figure S1.** Evolutionary analysis of paralogues of *AeaAPL1* of the *Ae. Aegypti*.

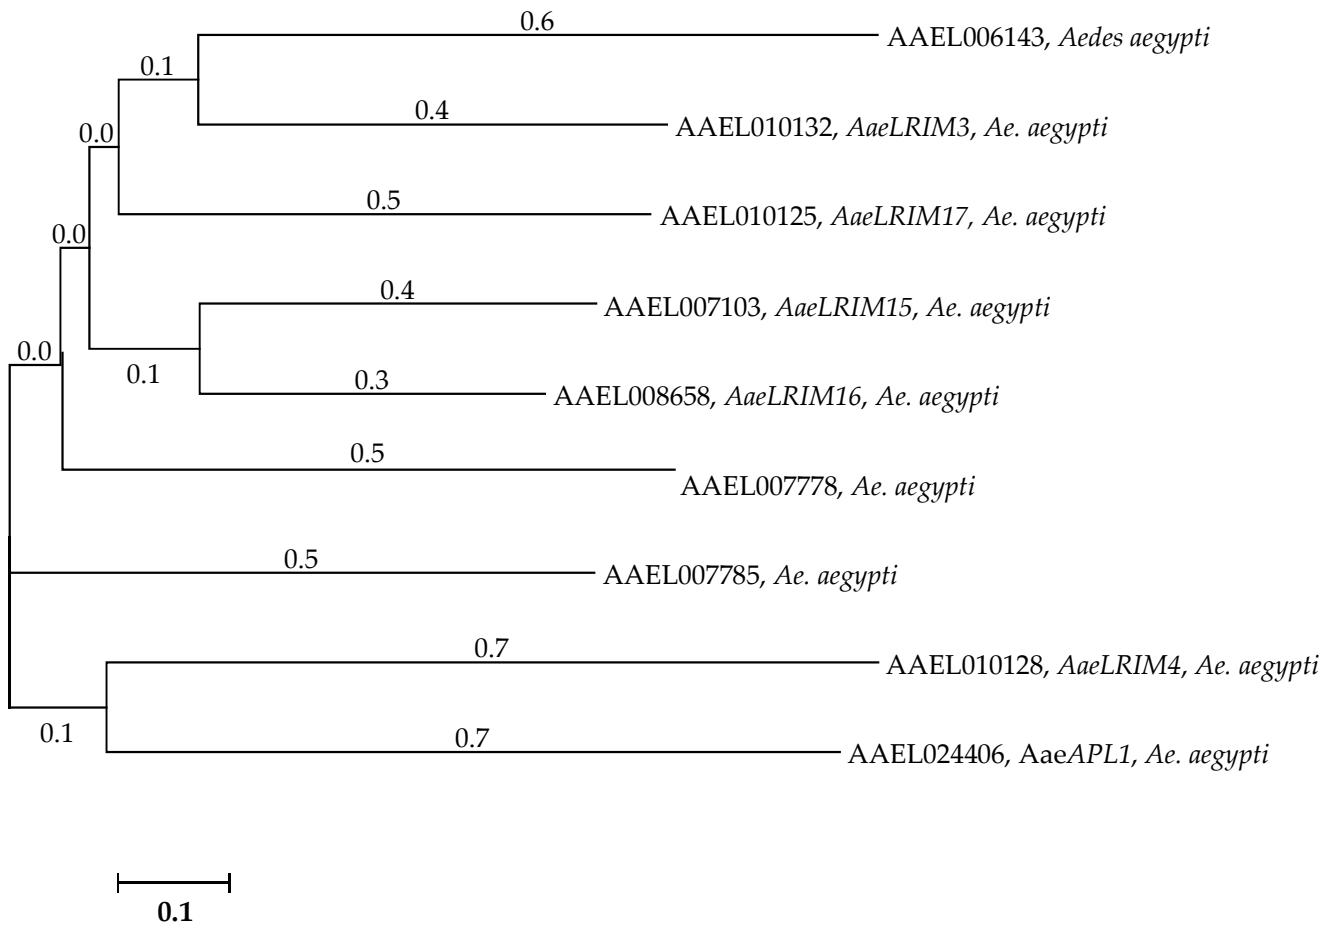

**Figure S1.** The evolutionary history was concluded by means of the Neighbor-Joining method [1]. The optimal tree with the sum of branch length = 4.948 is revealed. The tree is drawn to scale, with branch lengths in the same units as those of the evolutionary distances used to infer the phylogenetic tree. The evolutionary distances were calculated with the Maximum Composite Likelihood method [2] and are in the units of the number of base substitutions per site. The analysis contained 9 nucleotide sequences. All positions containing gaps and missing data were disregarded. The final dataset had a total of 1179 positions. Evolutionary analyses were performed in MEGA7 [3].

Saitou N. and Nei M. (1987). The neighbor-joining method: A new method for reconstructing phylogenetic trees. *Molecular Biology and Evolution* 4:406-425.

2. Tamura K., Nei M., and Kumar S. (2004). Prospects for inferring very large phylogenies by using the neighbor-joining method. *Proceedings of the National Academy of Sciences (USA)* 101:11030-11035.

3. Kumar S., Stecher G., and Tamura K. (2016). MEGA7: Molecular Evolutionary Genetics Analysis version 7.0 for bigger datasets. *Molecular Biology and Evolution* 33:1870-1874.

**Figure S2A-E.** *AaeLRIM3*, *AaeLRIM4*, *AaeLRIM15*, *AaeLRIM16*, and *AaeLRIM17* relative expression in the all developmental stages.

**A**

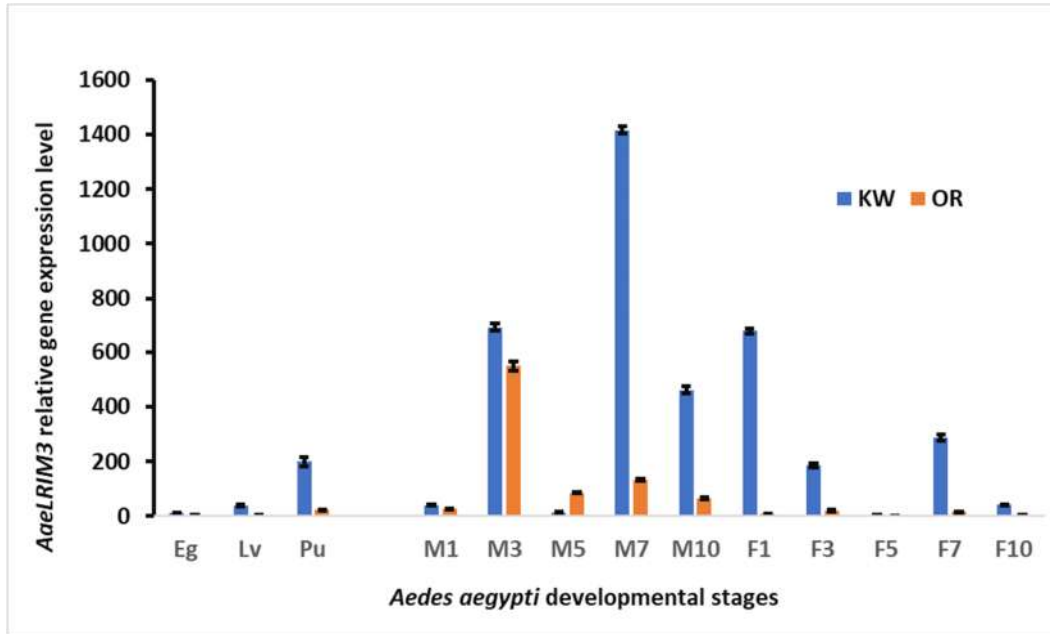

**Figure S2A.** *AaeLRIM3* relative expression in the all developmental stages.

**B**

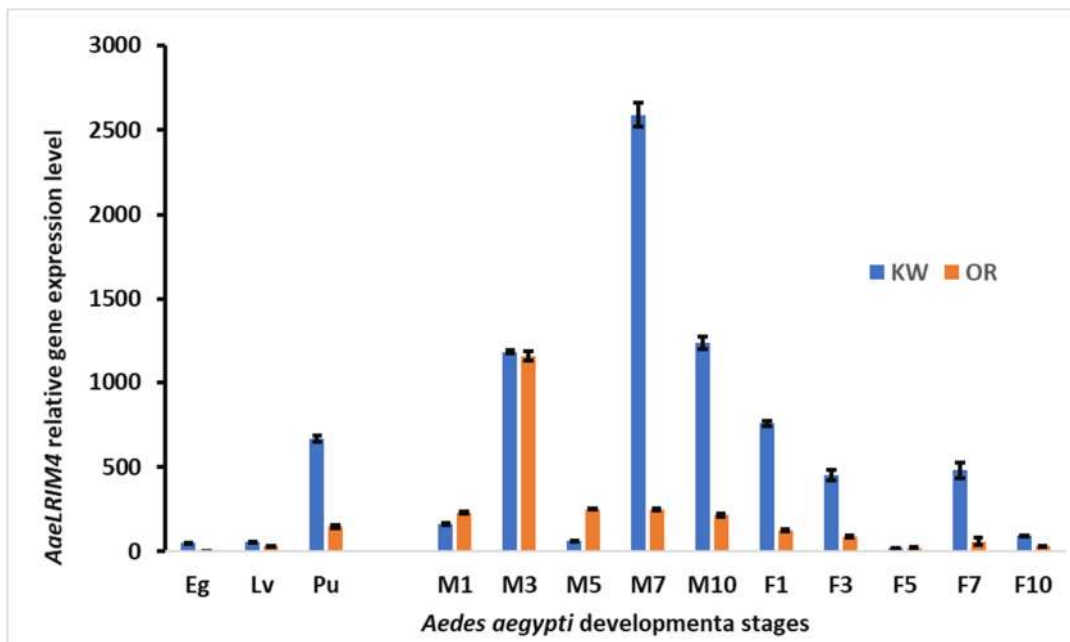

**Figure S2B.** *AaeLRIM4* relative expression in the all developmental stages.



C

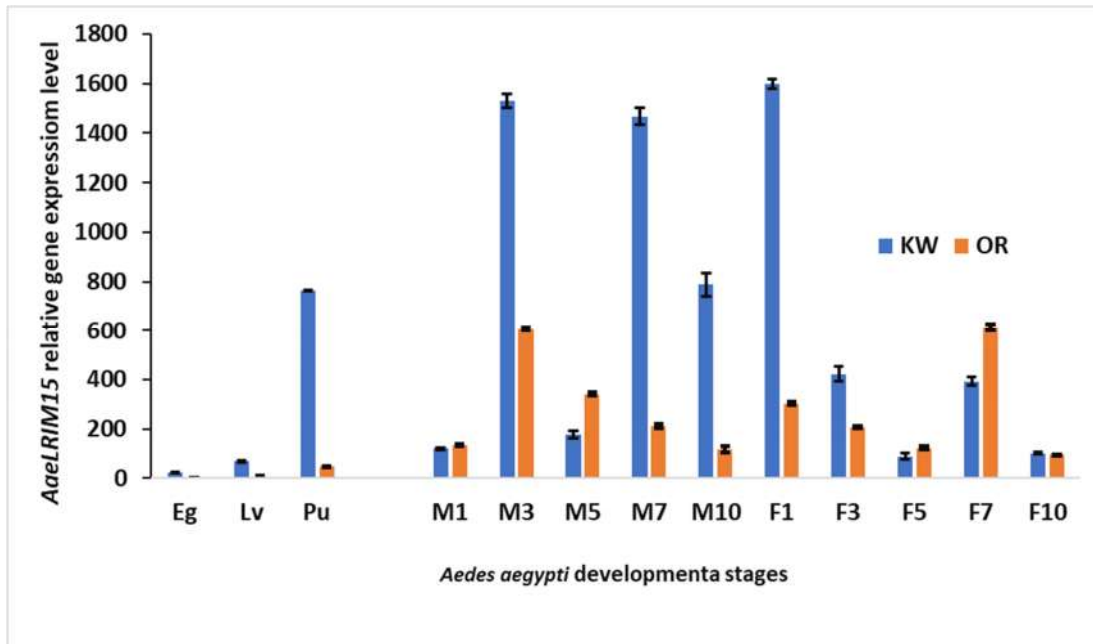

Figure S2C. *AaeLRIM15* relative expression in the all developmental stages.

D

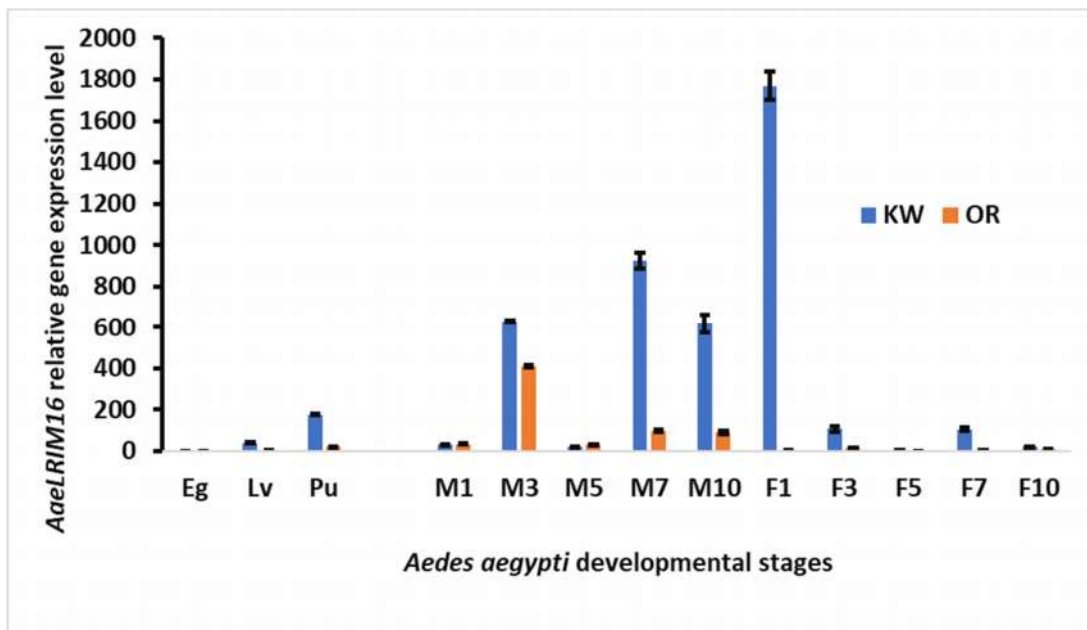

Figure S2D. *AaeLRIM16* relative expression in the all developmental stages.

**E**

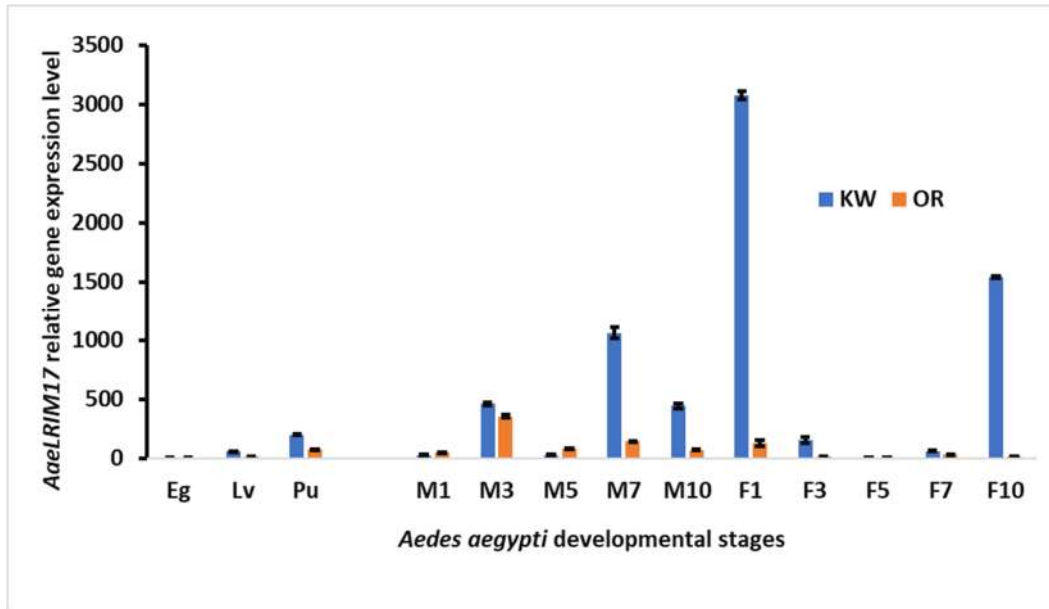

**Figure S2E.** *AaeLRIM17* relative expression in the all developmental stages.

**Figure S2A-E.** *AaeLRIM3*, *AaeLRIM4*, *AaeLRIM15*, *AaeLRIM16*, and *AaeLRIM17* relative expression in the all developmental stages, from eggs (Eg), larvae (Lv), pupae (Pu), and adults *Ae. aegypti*, including male (M1, male 1-d-old; M3, male 3-d-old; M5, male 5-d-old; M7, male 7-d-old; and M10, male 10-d-old) and female (F1, female 1-d-old; F3, female 3-d-old; F5, female 5-d-old; F7, female 7-d-old; and 10F, female 10-d-old) in the Key West strain (KW) and Orlando (OR) strain *Aedes aegypti*. (A) *AaeLRIM3*; (B) *AaeLRIM4*; (C) *AaeLRIM15*; (D) *AaeLRIM16*; and (E) *AaeLRIM17*.
